# Supplementary material for: The Development and Application of a Multiple Gene Co-Silencing System Using Endogenous URA3 as a Reporter Gene in Ganoderma lucidum
Source: PubMed Central journal article supplement (PMC3427163; doi:10.1371/journal.pone.0043737), 2012-08-24

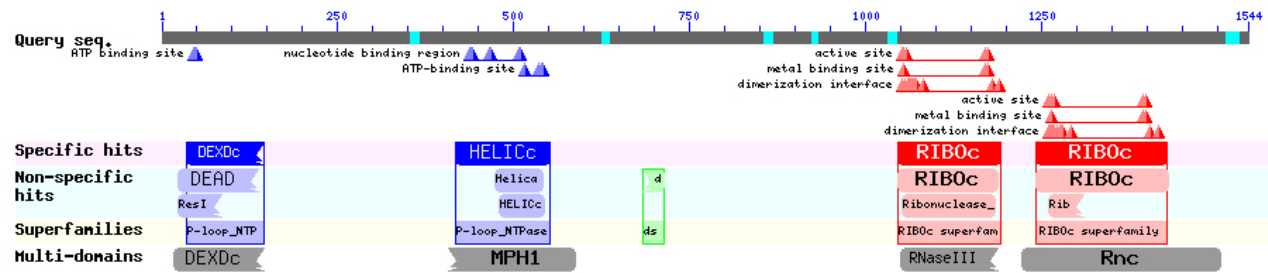

Supplement: pone.0043737.s001.pdf [file pone.0043737.s001.pdf]
