# Supplementary material for: The Development and Application of a Multiple Gene Co-Silencing System Using Endogenous URA3 as a Reporter Gene in Ganoderma lucidum
Source: PubMed Central journal article supplement (PMC3427163; doi:10.1371/journal.pone.0043737), 2012-08-24
Supplement: pone.0043737.s002.pdf [file pone.0043737.s002.pdf]

1 M P V V K N G D H T G L E E S T S G I V  
1 ATGCCTGTTGTCAAGAATGGCGACCACCCGGCCTCGAAGAATCAACGTCCGGCATTGTG  
21 H T R A Y Q H E L L E E S L R R N I I I  
61 CACACCCGAGCGTACCAGCACGAGCTTCTAGAAGAGAGCTTGGCGCCGCAACATCATCATT  
41 A L D T G S G K T H I A V L R M K H E T  
121 GCCCTCGACACCCGGTTCGGGAAAGACACACATCGCGGTCCTCAGAATGAAGCATGAGACT  
61 E H E S R K V S W F I A P T V A L V E Q  
181 GAACACGAGTCCCGCAAGGTTTCGTGGTTTATAGCTCCTACTGTGGCCCTTGTGAGCAA  
81 Q Y E V I K S T I P V S V G Y V S G S S  
241 CAATATGAAGTCATCAAATCTACCATACCTGTTTCGGTGGGATATGTGTGTCAGGGTCGTCG  
101 E P N Q W K D A K L W R R I L Q G H R I  
301 GAACCAACCAATGGAAGGACGCAAACTTTGGCGGAGGATTCTGCAGGGGCATCGGATC  
121 M V T T P Q V L L D A L H H V R I R G Y  
361 ATGGTCACAACCCCCAGGTGTTGCTCGATGCATTACATCACGTTAGGATACGTGGATAT  
141 G F Y W F V G S R R S S S R D W Q A P V  
421 GGGTTCTATTGGTTTGTGGTTCTCGACGAAGCTCATCACGCGATTGGCAAGCACCCGTA  
161 Q H D H E E P L F V T A A Q R Y R C L N  
481 CAACATGATCATGAAGAACCACTATTTGTTACCGCAGCGCAGCGCTATCGATGCCTCAAC  
181 F S C T S Y G P R T H S K S Y V W G Q R  
541 TTCTCGTGTACGTCCTATGGTCCTCGGACTCACAGCAAGTCCTACGTATGGGGCCAACGT  
201 R D C L Q V R A F C S G T T L G F T T N  
601 CGAGATTGCCTTCAGGTGCGTGCATTTTGTAGTGGCACAACCCTGGGATTCACCACGAAC  
221 L V R C V R D L E K N L D S T I R S S R  
661 CTCGTTGCTGTGTTAGAGATCTGGAGAAGAATCTGGACAGCACCATCCGCTCTTCGCGT  
241 N N R D E L A Q H V H R P E F K H I I Y  
721 AACAAACCGGGACGAACTGGCCCAACACGTTACCGACCGGAGTTCAAGCACATTATCTAC  
261 A S P V H T W D G I P S V N Y K A L S N  
781 GCTTCCCCTGTTTCATACCTGGGACGGCATCCCTTCTGTCAATTACAAGGCGCTCTCAAAC  
281 V M L T L D I E K D P Y V I A L R E R L  
841 GTGATGTTGACTTTAGACATCGAGAAGGACCCTTACGTCATTGCCCTTCGCGAACGTCTC  
301 A K L Q P G D D R R R V D Q Q L S K A I  
901 GCCAAACTCCAACCCGGCGACGACCGCCGCGCGTGGACCAACAACTCTCGAAGGCCATC  
321 D K E D T F T H K G L R D F A R T A A D  
961 GACAAGGAGGATACGTTTACACACAAAGGACTACGGGACTTCGCGCGCACTGCCGAGAT  
341 V C I E L G T W A A D W Y V A K V V E H  
1021 GTCTGCATCGAGTTAGGGACGTGGGCCGCGACTGGTACGTTGCGAAGGTCGTCGAGCAC  
361 A K K A A N P Y N N L M S A W Q E K E K  
1081 GCGAAGAAGGCTGCGAATCCGTACAACAACCTCATGTCAGCGTGGCAGGAGAAGGAGAAA  
381 R Y L L S I L E S V D I M E P S N D T G  
1141 CGGTACCTTCTGAGCATCCTTGAGTCAGTCGACATCATGGAGCCGTGGAACGATACTGGA  
401 E I L A N I T P K V R A L I D N L I L E  
1201 GAGATCCTCGCCAACATTACCCCGAAGGTCCGCGCCCTCATCGACAATTTGATCCTCGAG  
421 E A I F R S M D E D Y S G L I F A T R R  
1261 GAGGCCATCTTCGATCGATGGACGAAGATTACAGTGGCCTCATCTTCGCGACTCGCCGC

441 D T V L V L A E L L R R I P E T S Q L F  
1321 GACACCGTCTCTGTTCTTGC GGAGCTCCTTCGGCGTATCCCCGAAACCTCCCAGCTGTT  
461 R A G C L L G S S S S F K R H S F L D I  
1381 CGCGCTGGATGTCTACTGGGTTTCGTCTTCGAGCTTTAAGCGGCATTCTGTTCTTGGATATT  
481 T R S M L E D S Q S D T L R D F K I G D  
1441 ACGCGGAGCATGTTGGAGGACAGCCAGAGCGACACCCTGCGGGACTTCAAGATCGGCGAC  
501 K N L I V S T S V A E E G I D I Q A C G  
1501 AAGAACCTGATCGTCTCTACGTCTGTCGCGGAAGAAGGAATCGACATTCAAGCATGTGGA  
521 S V V R F D I P P N V V S W A Q S R G R  
1561 AGTGTGTCCGGTTCGATATTCCTCCAACGTCTGCTCTTGGGCGCAGAGCCGCGGCCGT  
541 A R R K R S S F I I M F D E A A P Q E V  
1621 GCGCGCCGAAAAGGAGTAGTTTCATCATCATGTTTCGACGAAGCCGCGCCGCAGGAGGTA  
561 V R K W E E T E R Q M M A A Y N D P K R  
1681 GTACGGAAGTGGGAGGAGACAGAGCGTCAGATGATGGCGGCTTACAACGATCCGAAACGG  
581 D A A A Y I E E D D F N D M D G Y V E V  
1741 GATGCCGCTGCTTACATCGAGGAAGATGACTTCAACGATATGGACGGTTATGTGAGGTC  
601 E I A S T G L V S F S S S S K M P A H V  
1801 GAAATTGCTTCCACTGGGTTAGTTTCCTTTTCTTCCAGCTCAAAGATGCCAGCTCACGTA  
621 P F S G P S R F I R R S R I S I T F A P  
1861 CCTTTTTCAGGGCCCTCCCGCTTCATTCGGCGATCCCGCATCTCAATCACTTTTTGCGCCC  
641 G T R D L G E Q Q L F S H E H F H P S T  
1921 GGTACTCGGGACCTTGGGGAGCAACAGTTATTCTCCACGAGCACTTCCACCCCAGTACG  
661 S Y V V M W I S Q R R V S S L R K F K T  
1981 TCGTATGTTGTTATGTGGATATCCAACGTGCGGTATCTAGCCTGCGGAAGTTCAAGACT  
681 E C I H R T K R R A Q Q H V A Y K A Y V  
2041 GAATGCATCCATCGTACGAAACGCCGAGCGCAGCAGCATGTAGCGTACAAGGCGTACGTG  
701 A L Y Q A G L L N N H L L P H T S G V E  
2101 GCGCTGTACCAGGCCGGTCTTCTGAATAACCACTTGCTCCCGCATACGAGCGGGCTCGAG  
721 P D K E E E V Q A M L A E V A K R E S T  
2161 CCTGACAAGGAGGAAGAAGTGCAGGCGATGCTGGCTGAGGTGGCCAAACGCGAAAGTACC  
741 A Q V S V Q I D P W V G V A E T S T W F  
2221 GCCCAAGTATCCGTCCAAATCGACCCATGGGTTGGTGTGCGGGAGACCTCAACTTGGTTT  
761 A H D L V V E G L P S L R M F T R R P L  
2281 GCGCACGATCTCGTAGTGAAGGCTTACCCTCCTTGCATGTTACCCGCGCCCACTA  
781 P T F T Q E D F P T L Y V P G R K E L S  
2341 CCGACGTTACCCAGGAAGATTTCCCGACATTATACGTTCTGGCCGCAAGGAGCTGTCA  
801 M T L G A A A S S P A S V E D I Q L A R  
2401 ATGACCCTCGGTGCTGCGGCTAGCTCTCCTGCGTCCGTGGAGGACATCCAGCTTGCAAGA  
821 R W T Y R L F W R M Y G A R M E R G N E  
2461 CGTTGGACGTACAGGCTTTTCTGGAGGATGTACGGAGCCCGGATGGAGCGCGGCAACGAA  
841 D F S Y L F L P T G P W P N A Q E W D E  
2521 GACTTTTCGTACCTCTTCTTGCCTACGGGACCTTGGCCGAACGCGCAGGAGTGGGACGAG  
861 R R R W M E E R L M S G L A D H G E T P  
2581 CGACGGAGATGGATGGAAGAGCGACTCATGTACGGCCTTGCAGACCACGGGAGACTCCA

881 F L A N A A V F G A A F S Y P R N L A M  
2641 TTTTGGCGAATGCTGCGGTATTCGGTGTGCGTTCTCATACCCACGGAATCTCGCAATG  
901 V R G T S K Y D K P L R L L Q W R S D P  
2701 GTCAGGGGACGAGCAAATACGACAAGCCTCTGCGGCTGCTGCAGTGGCGTTCCGACCCT  
921 L T A E E E E K L R E E Y S A F P D L E  
2761 CTCACCGCGGAAGAGGAAGAGAAGCTCCGTGAAGAGTATAGCGCGTTCCCAGATTTGGAA  
941 I T Y P L M V V H R L P K R R N F L I P  
2821 ATCACGTACCCGCTCATGGTCGTACACCGGCTCCCAAACGACGGAATTTCTCATACCC  
961 F S T D G T D Q R D P A H S D D G P S I  
2881 TTTTCTACTGACGGCACGGACCAGAGGGACCCTGCGCACTCCGACGACGGTCCGTCCATC  
981 L L P Q H T L V E L A S R D E V Q Y T L  
2941 CTCCTTCTCAGCATACCCTGGTCGAGCTCGCATCCCGAGACGAGGTTCAGTATACCTTG  
1001 V L P S I L R W L A M A S T V H S L R L  
3001 GTTCTTCCGTCTATCCTGCGGTGGCTAGCCATGGCATCAACCGTGCATAGCCTTCGTCTG  
1021 G L F K Q S P V S R V A L P L L A T A I  
3061 GGCCTCTTTAAGCAATCTCCGTTTTACGCGTCCGCGCTCCCGCTCCTCGCTACTGCCATC  
1041 T A P T A Q E R F H Y Q R L E T L G D T  
3121 ACTGCACCCACCGCTCAAGAGCGTTTTCACTACCAGCGACTCGAGACCCTTGGCGACAGC  
1061 V L K F I T S N Q L Y A N F P L W H E G  
3181 GTGTTGAAATTCATTACAAGTAATCAACTCTACGCGAACTTCCCTCTCTGGCACGAAGGG  
1081 Y L S R K K D H A V A N V N L A K W A V  
3241 TACCTCAGTCGGAAAAGGACCACGCCGTCGCCAACGTCAACCTGGCTAATGGGCCGTG  
1101 Q K G L Y R W I I R D R F V P R K W K P  
3301 CAGAAAGGGCTGTACAGGTGGATCATCCGTGATCGATTTCGTCCCAAGGAAGTGAAGCCC  
1121 H Y S T C N I D E I V D D S T E S T P P  
3361 CATTACTCTACATGCAACATCGACGAGATCGTGGACGACAGCACAGAGAGCACACCTCCA  
1141 P N G A V T L I Q S N G K D D E K K Q S  
3421 CCGAATGGCGCTGTGACGTTGATTCAAAGCAACGGCAAAGACGATGAAAAGAAACAGAGC  
1161 A E E L S T K M L A D V V E S L I G A A  
3481 GCTGAAGAGCTCTCGACCAAGATGCTTGCGGACGTCGTGGAGTCCCTCATCGGCGCGGCT  
1181 Y E Q G G F D L A I D C A A A F D L G L  
3541 TACGAGCAGGGCGGATTTGACCTCGCGATCGACTGTGCTGCGGCATTTCGATCTCGGTCTC  
1201 T W K K L P T Y V T A M H E V D D I D D  
3601 ACCTGGAAGAAACTCCCACATATGTTACAGCCATGCACGAGGTTGACGACATCGACGAT  
1221 I P E Q L E L V E Q M I D Y R F S R R T  
3661 ATTCCCGAACAGCTCGAACTGGTCGAGCAGATGATCGACTATCGCTTCTCCCGTCGACT  
1241 F L V Q A L T H A S Y Q G E S A S M S L  
3721 TTCCTCGTGCAGGCCCTCACCCACGCGAGCTACCAAGGCGAGTCCGCTCGATGTCGCTC  
1261 E R L E F L G D C A L D M V V V D Y L Y  
3781 GAGCGGCTTGAGTTCCTCGGCGACTGCGCCCTCGACATGGTCGTGTCGACTACCTCTAC  
1281 H A E G K D Y S P G Y M H I K K M A V V  
3841 CACGCAGAAGGCAAGGACTACAGTCCGGGCTACATGCACATCAAGAAAATGGCGGTGCTG  
1301 N S H I L A Y I C L K T S V T V Q S T M  
3901 AACTGCACATCCTCGGTACATCTGCCTCAAGACGTCCGTACCCTCCAGTCGACGATG

1321 P T W S L A H G L E S V D D S Q Q I H L  
3961 CCGACGTGGTCGCTCGCGCACGGGCTGGAGAGCGTCGACGACTCGCAGCAGATCCACCTC  
1341 W Q C L L H S S H R V L E D Q N L T F L  
4021 TGGCAGTGCCTCCTCCACTCGAGCCACCGGTGCTCGAGGACCAGAACCTCACCTTCTC  
1361 R F Q K H G A E I A N A L E H H S V Y P  
4081 CGCTTCCAGAAGCACGGCGCGGAGATCGCGAACGCGCTCGAGCACCACAGCGTGTACCCG  
1381 W A G L T S L Q A P K F I S D M V E S I  
4141 TGGGCGGGGCTGACGAGCCTCCAAGCGCCCAAGTTCATCAGCGACATGGTCGAGAGCATC  
1401 L G A V Y V D S R G D L G K V R Q V M E  
4201 CTCGGGGCGGTGTACGTCGACTCGCGCGGGGACTTGGGCAAGGTGCGGCAGGTGATGGAG  
1421 R L G L M R V L E R V V H D D V D A L H  
4261 CGGCTTGGGCTGATGCGAGTGCTGGAGCGCGTCGTGCACGACGACGTGGACGCGCTCCAT  
1441 P V S R L E I W A A R H K P K K G V K Y  
4321 CCCGTGTCGCGCCTAGAGATTTGGGCCGCGAGACATAAACCGAAGAAGGGGGTCAAGTAC  
1461 E I E K E K G K V H C K V L I D E K E L  
4381 GAGATCGAGAAGGAGAAGGGGAAAGTGCACTGCAAGGTGCTGATCGACGAGAAGGAGCTG  
1481 L T V T R T Y R S K V S E D E V R F T A  
4441 CTGACGGTCACGAGGACTTACCGGAGCAAGGTCAGCGAGGACGAGGTGCGGTTTACCGCA  
1501 A E E A N K M V L A G D I D F D K I E D  
4501 GCGGAGGAGGCGAACAAGATGGTTCTGGCAGGGGACATAGACTTCGACAAGATCGAAGAC  
1521 D Q S D D E E E Q V E A I L A N R E E D  
4561 GACCAATCAGATGACGAAGAGGAACAGGTGCAAGCGATCTTGCCAACCGCGAGGAGGAC  
1541 E V R N -  
4621 GAAGTGAGGAACTAG
