# Supplementary material for: The Development and Application of a Multiple Gene Co-Silencing System Using Endogenous URA3 as a Reporter Gene in Ganoderma lucidum
Source: PubMed Central journal article supplement (PMC3427163; doi:10.1371/journal.pone.0043737), 2012-08-24
Supplement: pone.0043737.s003.pdf [file pone.0043737.s003.pdf]

M-COFFEE SCORE=86

BAD AVG GOOD

|                                |      |
|--------------------------------|------|
| G.1                            | : 83 |
| Paracoccidioides brasiliensis  | : 89 |
| Trichophyton rubrum CBS 118892 | : 91 |
| Aspers terreus NIH2624         | : 85 |
| Arthroderma otae CBS 113480    | : 84 |
| Aspergillus niger CBS 513.88   | : 87 |
| cons                           | : 86 |

|                  |   |                                                                                      |    |
|------------------|---|--------------------------------------------------------------------------------------|----|
| G.1              | 1 | -----MPVVKNGDHTGL--EESTSGIVHTRA                                                      | 24 |
| Paracoccidioides | 1 | -----MSQAAKYPVIDSALKNGIGLDSYAASVFTPRA                                                | 32 |
| Trichophyton     | 1 | MPIKTHQEHLSTTAAATKRRRQQRCMATAKPELPGQMLALEEHKQGRKRPRSSSGSSDMRQNEAAQKAGLDSLEDAPDMMRPRG | 84 |
| Aspers           | 1 | -----MASLSDQDLEMGLFCPRN                                                              | 18 |
| Arthroderma      | 1 | MAA-----VELDLHSQKFLLEEKGQKRKRPSSSLGSSEMPQDESAGGASLNGQEGASAVVKSRA                     | 59 |
| Aspergillus      | 1 | -----MTVAATVLPAGEDAPAYRPRS                                                           | 21 |
| cons             | 1 | -----:-----*                                                                         | 84 |

|                  |    |                                                                                       |     |
|------------------|----|---------------------------------------------------------------------------------------|-----|
| G.1              | 25 | YQHELLEESLRNIIIALDTGSGKTHIAVLRMKHETEHSRKVSWFIAPTVALVEQQYEVIKSTIPVSVGYVSGSSEPQWK       | 106 |
| Paracoccidioides | 33 | YQLEMLEASLKENIIIAMDTGSGKTQIAILRIRHELETCTEDKLVWFLTPPTVALADQQHKNISQQLSVYQTRLLLGTDKVHYWS | 116 |
| Trichophyton     | 85 | YQREMLEASIKQNIIVAMDTGSGKTQIAILRIRHELERCSNDKLVWFLAPKVPLAEQQYRAISEQLPAYQTKILTGDNLERWS   | 168 |
| Aspers           | 19 | YQTEMFEASLQENIIIVAMDTGSGKTHVALLRIMNELETRRPQKLIWFLAPTVALCFQQHDVITKNLPAVKSRTLTGQDKVELWT | 102 |
| Arthroderma      | 60 | YQVEMLEESLQNIIVAMDTGSGKTQIAILRIRHELERCPHKLIVWFLAPKVPLAEQQYLAISKQLPAYQTRILTGDNLERWS    | 143 |
| Aspergillus      | 22 | YQVEMFEASLKENIIVTMGTGSGKTHIALLRRIKELESNPHKLIWFLTPPTVALCLQQFKFLSDNIPAVRARTLTSLDKVELWT  | 104 |
| cons             | 85 | ** *::* *:::***:::*****:::***: * * * : **::*.*.* ** . :. :. : . : . *                 | 168 |

|                 |     |                                                                                   |     |     |
|-----------------|-----|-----------------------------------------------------------------------------------|-----|-----|
| G.1             | 107 | DAKLWRRILQGHRIMVTTTPQVLLDALHH--VRIRGYGFYWFVGSRRSSSRDWQAPVQHDHEEPLFVTAQRYRCLNFSCTS | YGP | 188 |
| Paracoccidioide | 117 | TKKIWDVLLNIKIVVSTPQILLDALSHGFITMSRISLLVFDEAHHCDFSPANTIMQRF-----                   | YHE | 179 |
| Trichophyton    | 169 | TQQIWDAFLLNTRIVVSTPQILLDVLSNGFITLRRIALLVFDEAHHCVKASPENKIMKNF-----                 | YHA | 231 |
| Aspers          | 103 | EQAIWDAILKDMQVVVSTHAVLADAMSNGFVRSQGLLIFDEAHHCMRRHPANRIMQDF-----                   | YHP | 165 |
| Arthroderma     | 144 | TQKIWDFAFLLNTRIVVSTPQVLLDALSNGFITLRRIALLVFDEAHHCVKASAPENRIMQNF-----               | YHA | 206 |
| Aspergillus     | 105 | EQPVWDAILKEMQVVVSTHAVLADAMSHGFVKITQLGLMIFDEAHHCMRRHPANKIMQDF-----                 | YHP | 167 |
| cons            | 169 | :* .* :::** : * *.: : : : .: * :.: . : : .                                        | *   | 252 |

|                 |     |                                                                                     |        |     |
|-----------------|-----|-------------------------------------------------------------------------------------|--------|-----|
| G.1             | 189 | RTHSKSYVWGQRRDCLQVRAFCSGTTLGFTTNLVRCVRDLEKNLDSTIRSSRNNRDELAQHVRPEFKHIYASPVHTWDGIPS  | 272    |     |
| Paracoccidioide | 180 | QLQ----RTGKTDLPHILGLTASPVTRADP---ESLKRVEKNLNARCETPRIHREELMRYVHRPELYTVKFRT----       | DSLIHS | 252 |
| Trichophyton    | 232 | RID----QLSETNDLPSILGLTASPTSRLIE---DSLRLQLEQNDAFCKTPAIHREEMMQYVHIPELLKVSQK----       | DSIIPH | 304 |
| Aspers          | 166 | TLV----KQG-PDAVPGILGLTASPVVRTNS---QELSMIESNMNAICKTPRAHRQELLTHTHRPHLQQIWTYPVNIDDPTS  | SGT    | 241 |
| Arthroderma     | 207 | QVH----QLRKTNDLPYILGLTASPTSSSAE---DALRQLELNLHACCKTPNIHREEMMQFVHIPELRKVSQK----       | DLMLLN | 279 |
| Aspergillus     | 168 | ALE----RHG-AEAVPKILGLTASPVVRSNR---QELLKIESNLDAVCKTPRTHRSELMTHTHRPHLQQILFTPVLDDLQVGS |        | 243 |
| cons            | 253 | : .: :... : : * *.: : .: : * *.: : .: : * *.: : :                                   |        | 336 |

|                 |     |                                                                                      |     |     |
|-----------------|-----|--------------------------------------------------------------------------------------|-----|-----|
| G.1             | 273 | VNYKALSNVMLTLDIEKDPYVIALRERLAKLQPGDDRRRVDQQLSKAIDKEDTFTHKGLRDFARTAADVCIELGTWAADWYVAK | 356 |     |
| Paracoccidioide | 253 | DMLQNLRSRIVGTVDIEKDPWIKRLRQEQE-----DRRSQEKLLYALEKRKTHCLSQLSKLLRQAINVHDDLGPWAADAFISE  | 328 |     |
| Trichophyton    | 305 | NMKMKYLHMLDDIDIESDPFFQRYKGKT-----DRKSTERFLCALA-RKTPCLDQLKRCFTKVSHMYGELGHWASSTYISE    | 379 |     |
| Aspers          | 242 | RTLRALIHAWETIDLEDDPYVKQLRRST-----F--DGKALQKALLTRKTYCNESLRRFVERSCHIFQELGGWAVDYFIHA    | 315 |     |
| Arthroderma     | 280 | NLEVKFFAMLNSIDIQDDPFFQRYKGKH-----DRKSQERYTLALE-RKTPCLIQLKRCFSKIVYMFSELGLWAASTYISE    | 354 |     |
| Aspergillus     | 244 | KTLKALVSAWTSRLREDDPYIKLRKSP-----L--DGRALQKVLES GKTYCNDQLKRFATRSLHIFEELGEWAADYFIHA    | 317 |     |
| cons            | 337 | : :. **.: : : .: .: * * : : ** ** .: :                                               |     | 420 |

|                 |     |                                                                                      |     |
|-----------------|-----|--------------------------------------------------------------------------------------|-----|
| G.1             | 357 | VVEHAKKAANPYNN--LMSAWQEKEKRYLLSILESVDIM--EP-SNDTGEILANITPKVRALIDNLILEEAIFRSMDEYSGLI  | 435 |
| Paracoccidioide | 329 | VIERLETKRTMYQHVELHSSLDREEEAFIFELLSSELSISPVKQ-DWDSKSN--IVSTKVNLLVELLESEH-----TADFTGII | 403 |



|             |     |                                                                                  |     |
|-------------|-----|----------------------------------------------------------------------------------|-----|
| Arthroderma | 592 | IESTGALLTLDNARQHLSHF CSTLP CD - FTDIQPDFIISKAVAGTMFTAKVLLPTALDP ----- QFREFEGIRT | 659 |
| Aspergillus | 553 | VQSTGAVLTADTAVAHLNHFCAVLPRQPYPASNEPEFSYKDDA - DLLRGTVTLPSCVHP ----- GVERRIQGQRW  | 620 |
| cons        | 673 | : *** ::: .: * . : : . . . . . *                                                 | 756 |

|                  |     |                                                                                          |     |
|------------------|-----|------------------------------------------------------------------------------------------|-----|
| G.1              | 684 | HRTKRRAQQHVAYKAYVALYQAGLLNNHLLPHTSGVEPDKEEEVQAMLAEVAKRESTAQVSVQIDPWVGVAETSTWFAHDLVVE     | 767 |
| Paracoccidioides | 634 | WKTERMAQRDASFQAYLKLYNEGLVNDYLLPVHWRGDEDPK ----- LEYCEQRPSVVKISRHFDPWSTIA --SRWETTQKIFYQ  | 709 |
| Trichophyton     | 683 | WKREKMAKRDAAFQAYLQLYEVGLVNDHLMPEHCR - TTDEE ----- TAHVEKRTSMATCSEVFNPKMVA --YRWHSTDTFYQ  | 757 |
| Aspers           | 619 | WTTERAATKEAAFQTCRKYEFGLLNDHLLPLTRK - PELR ----- LTDFGGLPSIIEVAEQYDPWTDWAY --SWSSPD -IHQ  | 691 |
| Arthroderma      | 660 | WKKEKMAKRDAAFQAYLQLYEVSLVNEHLMPEHCH - TTDEE ----- TAHIEKHPSTATCSEAFSPWETIA --DQWQATDTFYQ | 734 |
| Aspergillus      | 621 | WQTERAARKEAAFQAYKRLYEFGLLSDHLLPFKRN - LELK ----- ETDLTNLPALVEVSEQYDPWVDWAC --SWSSPD -VHQ | 693 |
| cons             | 757 | : : * : . . . . . : : * : . . . . . * : : . :                                            | 840 |

|                  |     |                                                                                             |     |
|------------------|-----|---------------------------------------------------------------------------------------------|-----|
| G.1              | 768 | G-----LPSLRM - FTRRPLPTFTQEDFPTLYVGRKELSM T LGAAASSPASVEDIQLARRWYRFLFRMYGARMERGN            | 839 |
| Paracoccidioides | 710 | TLIEISSDSIPFPQMRLL - VLPVPLPC --- DISFNIFWNNENTFEVHLK - QESSITASLIKHAQAATHAIFSSMF SHKMP SDR | 787 |
| Trichophyton     | 758 | SSIVIASGTEELPRMLL - ILPIPLPC --- DFTVKLFWNEKSTLLASVS - PQELTVSDEDIVSAPLATHILLSSVFP SRMNGTS  | 835 |
| Aspers           | 692 | SRIRVQLNGNPEYQLSMLMGPTVLPA --- LDAMTLFWDSQNIFTLAFDAAQRVPLVPGDVIEHMRAITAYLQAPSSRSIREE        | 772 |
| Arthroderma      | 735 | SSIVISSGTEELPKMLL - ILPAPLPC --- SFTFKLFWNETSTLSVSVS - PEALTISDKDITSAPLATHILLSSVYSSRMNGDS   | 812 |
| Aspergillus      | 694 | TRIAIKHNGDS - RMCIRLTSPTS LPP --- VEPMTLFWDSETIYTLDFDKPKRMKEIAAESIENMRLATAYLQAASSRQMRPE     | 772 |
| cons             | 841 | : : * : . . . . . * : : . . . . . : : :                                                     | 924 |

|                  |     |                                                                                        |     |
|------------------|-----|----------------------------------------------------------------------------------------|-----|
| G.1              | 840 | EDFSYLFLPTGFPWNAQEWDERRRWMEERLMSGLADHGETPFLANA AVFGAAFSYPRNLAMVRGTSKYDKPLRLLQW -----R- | 917 |
| Paracoccidioides | 788 | FDFSCFLPEVELTE --- DEMMKWYSSVQGIQA ----- SDASHYDIESLSKLG LVRRCRDLERPWTAERYRWMKPFS      | 857 |
| Trichophyton     | 836 | RDFSCIFAPDLAEGH --- GGLESWCTKVSESILG ----- RNIVSGGLSSIGDFGLARRTDIYARAWVAEKFWVMKRVR     | 905 |
| Aspers           | 773 | RDYVALFGPDL - PH --- TELGAWLLKNGGNDTA ----- LDVYSRQVASP - TMGIVRDRTRYDEPLLFKKW -----VV | 834 |
| Arthroderma      | 813 | RDFSCVFPALDKGY --- SGLKEWCTKVNKSILG ----- KDIENYNLSPV - DFGLARRTDITARPWTVDKFWVMKPV     | 881 |
| Aspergillus      | 773 | QDFVTLFGPDL - TD --- LELAEWLNKHAGDEPA ----- LEVYSRKDFPT - VMGIVRDRSRYNEPMLFKRW -----VV | 834 |





|              |      |                                                                                      |      |
|--------------|------|--------------------------------------------------------------------------------------|------|
| Trichophyton | 1358 | SRGSILACQKFLTRIGLMDYLQRVLEDDGIDFMHPKQRLGVVAQSLSVQYVSEVHVKPG-----V-TQWKCQVLVGDEEIS--  | 1433 |
| Aspers       | 1273 | SRGDLVDCAMFVERIGLLPYLRRILADR-VDVMHPRHT-AQRLSKGEALFTAKRVVDGSG-----NASYRCVVKRNKEE-I-V  | 1346 |
| Arthroderma  | 1336 | SRGSVEACQTFLSRIGLMGYLNRVLDGNIIDFMHPKQRLGQIVQSLTVKYIVSDVH-KHG-----V-MRWNCQILVGDQEIC-- | 1410 |
| Aspergillus  | 1276 | SHGNLAECEKFLERLGLLRYLRRILKDE-VDVMHPRNI-AQQMAKGEIRFEVLRVPNEGGGGEDDGATYRC'VKMAGVDGVAV  | 1357 |
| cons         | 1513 | *:*.:. .: *:**: *.*:*: * :* :**                                                      | 1596 |

|                 |      |                                                                  |      |
|-----------------|------|------------------------------------------------------------------|------|
| G.1             | 1482 | TVTRTYRSKVSEDEVRFATAEEANKMVLAGDID--FDKIEDDQSDDEEEQVEAILANREDEVRN | 1544 |
| Paracoccidioide | 1387 | EE----HDGVSLVEVETKAAEAALSVLQNR-----GAG                           | 1415 |
| Trichophyton    | 1434 | RV----DDGVSQNQARAKAADLAEVLRTE-----N                              | 1460 |
| Aspers          | 1347 | VV----EGCLSSEEAEVKAANATIGILRANAVN--L-----V                       | 1377 |
| Arthroderma     | 1411 | QI----NDGVSRIHAETKAAEIALEILQTR-----N                             | 1437 |
| Aspergillus     | 1358 | VV----EGCLTSEEAETAAERAVEILVEQINASRFL-----GWVSSSPSNTSSRRSYQ       | 1407 |
| cons            | 1597 | . :. . . .** : : :                                               | 1661 |
